# Supplementary material
Source: publisher figshare collection journal article supplement (https://acs.figshare.com/ndownloader/files/24173915)
Supplement: Supplementary file 1 [file 24173915]

## Sheet: Collated for Graphic
	Year	Metal Catalysis	Organic reaction (without metal catalyst)	QM Descriptors	Method Development	Total
	2005	1	2	1	0	4
	2006	1	1	0	0	3
	2007	0	2	0	0	2
	2008	2	3	1	0	5
	2009	2	3	0	0	5
	2010	3	3	2	0	6
	2011	3	6	0	0	9
	2012	2	3	0	1	5
	2013	2	5	1	1	8
	2014	12	8	1	1	20
	2015	5	8	0	1	13
	2016	8	8	1	2	17
	2017	9	11	1	0	23
	2018	8	5	0	1	14
	2019	6	6	1	1	14

## Sheet: Updated Ref List
Company1	Company2	Company3	Journal	Year	Volume	Page start	Page end	Title	TS (Mechanistic) Calculations	Metal catalysis	Organic reactions (no metal catalysis)	QM descriptors	Method development	Functional	Solvation
AstraZeneca	Merck		Synthesis	2005	2005	3463	3467	The origins of periselectivity and substituent effects in electrocyclizations of o-nitrosostyrenes: A computational study	x		x			B3LYP	CPCM
Novartis			Synthesis	2005	2005	2562	2570	Synthesis and Wagner-Meerwein rearrangement of 9-(α-hydroxyalkyl)xanthenes to 10-substituted dibenz[b,f]oxepins: Scope, limitations and ab initio calculations			x			B3LYP, RHF
Pfizer			J. Mol. Struct.: THEOCHEM	2005	725	31	37	A simple method for reaction rate prediction of ester hydrolysis				x		AM1
Pfizer			Org. Lett.	2005	7	1011	1014	Proximity Effects in the Palladium-Catalyzed Substitution of Aryl Fluorides	x	x				B3LYP
BI			J. Org. Chem.	2006	71	8864	8875	Epimerization Reaction of a Substituted Vinylcyclopropane Catalyzed by Ruthenium Carbenes: Mechanistic Analysis	x	x				B3LYP
Pfizer			Compr. Med. Chem. II	2006	4	379	420	Quantum mechanical calculations in medicinal chemistry: relevant method or a quantum leap too far?
Pfizer			Org. Process Res. Dev.	2006	10	464	471	Synthesis of the CETR inhibitor Torcetrapib: The resolution route and origin of stereoselectivity in the iminium ion cyclization	x		x			MP2, B3LYP	PCM
J&J			Org. Lett.	2007	9	4099	4102	Cycloaddition Reactions of Thiazolium Azomethine Ylides: Application to Pyrrolo[2,1-b]thiazoles			x			B3LYP	PCM
Bristol-Myers			Bioorg. Med. Chem. Lett.	2007	17	1432	1437	Pyrazole-based factor Xa inhibitors containing N-arylpiperidinyl P4 residues			x
AstraZeneca			Organometallics	2008	27	1372	1383	Computational descriptors for chelating P,P- and P,N-donor ligands		X		X		BP86
AstraZeneca			J. Org. Chem.	2008	73	8511	8519	Theoretical Prediction of a Perepoxide Intermediate for the Reaction of Singlet Oxygen with trans-Cyclooctene Contrasts with the Two-Step No-Intermediate Ene Reaction for Acyclic Alkenes	x		x			B3LYP, CASMP2
GSK			Rapid Commun. Mass Spectrom.	2008	22	314	320	Tandem mass spectrometry and hydrogen/deuterium exchange studies of protonated species of 1,1'-bis(diphenylphosphino)-ferrocene oxidative impurity generated during a Heck reaction		x				B3LYP
Bristol-Myers			Bioorg. Med. Chem. Lett.	2008	18	586	595	From rigid cyclic templates to conformationally stabilized acyclic scaffolds. Part II: Acyclic replacements for the (3S)-3-benzylpiperidine in a series of potent CCR3 antagonists			x			B3LYP
Bristol-Myers			Bioorg. Med. Chem. Lett.	2008	18	576	585	From rigid cyclic templates to conformationally stabilized acyclic scaffolds. Part I: The discovery of CCR3 antagonist development candidate BMS-639623 with picomolar inhibition potency against eosinophil chemotaxis			x			B3LYP
AstraZeneca			Adv. Synth. Catal.	2009	351	903	919	Mechanism of the Asymmetric Sulfoxidation in the Esomeprazole Process: Effects of the Imidazole Backbone for the Enantioselection	x		x			B3LYP
AstraZeneca			Chem. Phys. Lett.	2009	476	37	40	Prediction of ring formation efficiency via diene ring closing metathesis (RCM) reactions using the M06 density functional	x		x			B3LYP, M06, M06-L	CPCM
AstraZeneca			J. Org. Chem.	2009	74	9328	9336	Efficient Chemoenzymatic Dynamic Kinetic Resolution of 1-Heteroaryl Ethanols	x	x				B3LYP	PBF
AstraZeneca			Org. Biomol. Chem.	2009	7	4842	4852	Neighbouring group participation vs. addition to oxacarbenium ions: studies on the synthesis of mycobacterial oligosaccharides	x		x			B3LYP	IEF-PCM
BMS			Angew. Chem., Int. Ed.	2009	48	5958	5961	Mechanistic Insight into the Palladium-Catalyzed 1,4-Oxidation of 1,3-Dienes to 1,4-Dicarboxy-alk-2-enes		x				HF
AstraZeneca			J. Mol. Catal. A: Chem.	2010	324	39	47	A computational study of phosphine ligand effects in Suzuki-Miyaura coupling	x	x				B3LYP	PBF
AstraZeneca			J. Org. Chem.	2010	75	4696	4705	Validation of a Computational Model for Predicting the Site for Electrophilic Substitution in Aromatic Systems			x			B3LYP	PCM
AstraZeneca			J. Phys. Chem. A	2010	114	10988	10996	A Quantum Mechanical Study of Methacrylate Free-Radical Polymerizations	x		x	x		AM1,UB3LYP
AstraZeneca			Organometallics	2010	29	6245	6258	Expansion of the Ligand Knowledge Base for Monodentate P-Donor Ligands (LKB-P)		x		x		BP86
AstraZeneca			Tetrahedron: Asymmetry	2010	21	2859	2867	Novel tetrahydroisoquinoline based organocatalysts for asymmetric Diels-Alder reactions: insight into the catalytic mode using ROESY NMR and DFT studies	x		x			B3LYP
BI			J. Org. Chem.	2010	75	1550	1560	Palladium-Catalyzed Decarboxylative Cross-Coupling Reaction Between Heteroaromatic Carboxylic Acids and Aryl Halides		x				B3LYP
AstraZeneca			Chem. Commun.	2011	47	5428	5430	What is the initiation step of the Grubbs-Hoveyda olefin metathesis catalyst?		x				B3LYP	C-PCM
AstraZeneca			Chem. Sci.	2011	2	2367	2372	Silene equivalents through the rhodium-catalysed reactions of a-hypersilyl diazoesters: a computational and experimental study			x			B3LYP
AstraZeneca			Chem. - Eur. J.	2011	17	13087	13094	Why is RCM Favoured Over Dimerisation? Predicting and Estimating Thermodynamic Effective Molarities by Solution Experiments and Electronic Structure Calculations		x				M06-L	C-PCM
AstraZeneca			J. Org. Chem.	2011	76	6749	6767	Catalytic Phosphorus(V)-Mediated Nucleophilic Substitution Reactions: Development of a Catalytic Appel Reaction	x		x			B3LYP
AstraZeneca			J. Phys. Org. Chem.	2011	24	751	763	Base-dependent selectivity of an SNAr reaction	x		x			B3LYP	IEF-PCM
AstraZeneca			Org. Process Res. Dev.	2011	15	688	692	A Simplified Process for the Manufacture of AZD0530, a Potent SRC Kinase Inhibitor			x			B3LYP	IEF-PCM
AstraZeneca			Organometallics	2011	30	230	238	Sterically Governed Selectivity in Palladium-Assisted Allylic Alkylation	x	x				B3LYP	PBF
AstraZeneca			Tetrahedron Lett.	2011	52	3150	3153	A pragmatic procedure for predicting regioselectivity in nucleophilic substitution of aromatic fluorides			x			B3LYP	PBF
GSK			J. Pharm. Biomed. Anal.	2011	56	1106	1111	Gas-phase derivatization via the Meerwein reaction for selective and sensitive LC-MS analysis of epoxides in active pharmaceutical ingredients			x			B3LYP
AstraZeneca			Chem. - Eur. J.	2012	18	321	333	Do Glycosyl Sulfonium Ions Engage in Neighbouring-Group Participation? A Study of Oxathiane Glycosyl Donors and the Basis for their Stereoselectivity	x		x			B3LYP, M06	IEF-PCM
AstraZeneca			Chem. - Eur. J.	2012	18	1640	1649	tBu or not tBu?	x	x				B3LYP, M06, M06-D	PBF
AstraZeneca			Eur. J. Org. Chem.	2012	2012	5673	5677	Searching for the Hidden Hydrides: The Competition between Alkene Isomerization and Metathesis with Grubbs Catalysts	x	x				M06-L	C-PCM
AstraZeneca			J. Org. Chem.	2012	7	3262	3269	Predicting Regioselectivity in Nucleophilic Aromatic Substitution	x		x		x	B3LYP	PBF, IEF-PCM
AstraZeneca			Org. Biomol. Chem.	2012	10	3859	3865	Diastereoselective alkylation reactions of 1-methylcyclohexa-2,5-diene-1-carboxylic acid			x			B3LYP, wB97XD
AstraZeneca			ACS Catal.	2013	3	1929	1939	Olefin Metathesis by Grubbs-Hoveyda Complexes: Computational and Experimental Studies of the Mechanism and Substrate-Dependent Kinetics	x	x				M06-L	C-PCM
AstraZeneca			Beilstein J. Org. Chem.	2013	9	791	799	Utilizing the s-complex stability for quantifying reactivity in nucleophilic substitution of aromatic fluorides	x		x	x	x	B3LYP/M06-2X	PBF, C-PCM
AstraZeneca			Chem. - Eur. J.	2013	19	13492	13503	Evaluating cis-2,6-Dimethylpiperidide (cis-DMP) as a Base Component in Lithium-Mediated Zincation Chemistry			x			B3LYP
BI			J. Am. Chem. Soc.	2013	135	5565	5568	Carbamoyl anion addition to N-sulfinyl imines: Highly diastereoselective synthesis of α-amino amides			x			B3LYP	CPCM
BI			J. Org. Chem.	2013	78	3592	3615	Zinc Catalyzed and Mediated Asymmetric Propargylation of Trifluoromethyl Ketones with a Propargyl Boronate	x	x				B3LYP
BI			Org. Lett.	2013	15	1136	1139	[2,3]-Sigmatropic Rearrangements of 2-Phosphineborane 2-Propen-1-ols: Rapid Access to Enantioenriched Diphosphine Monoxide Derivatives	x		x			HF
Vertex			Eur. J. Org. Chem.	2013	2013	4238	4241	Improvement in the One-Carbon Chain Extension of Esters with Dimethylsulfoxonium Methylide	x		x			M06–2X
Bristol-Myers			J. Pharm. Biomed. Anal.	2013	87	191	217	Critical practical aspects in the application of liquid chromatography-mass spectrometric studies for the characterization of impurities and degradation products
AstraZeneca			ACS Med. Chem. Lett.	2014	5	915	920	Alkylidene Oxapenem ﻿β-Lactamase Inhibitors Revisited: Potent Broad Spectrum Activity but New Stability Challenges			x	x		B3LYP	IEF-PCM
AstraZeneca			ChemCatChem	2014	6	1277	1282	Mechanistic Aspects of Submol% Copper-Catalyzed C-N Cross-Coupling	x	x				B3LYP-D3	PBF
AstraZeneca			Chem. Sci.	2014	5	1241	1250	Breaking conjugation: unusual regioselectivity with 2-substituted allylic substrates in the Tsuji-Trost reaction	x	x				B3LYP-D3	PBF
AstraZeneca			Dalton Trans.	2014	43	8894	8898	Fast and reversible insertion of carbon dioxide into zirconocene-alkoxide bonds. A mechanistic study	x	x				B3LYP-D3	PBF
AstraZeneca			J. Chem. Theory Comput.	2014	10	2427	2435	Stereoselectivity in Asymmetric Catalysis: The Case of Ruthenium-Catalyzed Ketone Hydrogenation	x	x			x	B3LYP
AstraZeneca			J. Org. Chem.	2014	79	11961	11969	Role of the Base in Buchwald-Hartwig Amination	x	x				B3LYP-D3, M06	PBF
AstraZeneca			J. Pharm. Sci.	2014	103	1949	1955	Prediction of Drug Candidates Sensitivity Toward Autoxidation: Computational Estimation of C–H Dissociation Energies of Carbon-Centered Radicals			x			B3LYP
AstraZeneca			J. Org. Chem.	2014	79	12148	12158	Homologation of Boronic Esters with Organolithium Compounds: A Computational Assessment of Mechanism	x		x			B3LYP-D3, LCCSD(T0)	SMD
AstraZeneca			J. Org. Chem.	2014	79	11841	11850	Investigating the Nature of Palladium Chain-Walking in the Enantioselective Redox-Relay Heck Reaction of Alkenyl Alcohols	x	x				M06	SMD
AstraZeneca			J. Am. Chem. Soc.	2014	136	8642	8653	A Mechanistic Study of the Lewis Base-Directed Cycloaddition of 2-Pyrones and Alkynylboranes	x		x			B3LYP	IEF-PCM
AstraZeneca			J. Am. Chem. Soc.	2014	136	1960	1967	Mechanism, Reactivity, and Selectivity in Palladium-Catalyzed Redox-Relay Heck Arylations of Alkenyl Alcohols	x	x				M06	SMD
AstraZeneca			Org. Lett.	2014	16	6456	6459	Synthesis of a Tetrahydronaphthyridine Spiropyrimidinetrione DNA Gyrase Inhibiting Antibacterial Agent - Differential Substitution at all Five Carbon Atoms of Pyridine			x			B3LYP, M06-2X	IEF-PCM
AstraZeneca			Org. Biomol. Chem.	2014	12	3598	3603	Practically convenient and industrially-aligned methods for iridium-catalysed hydrogen isotope exchange processes			x			M06
AstraZeneca			Organometallics	2014	33	2121	2133	Mechanistic Investigations of Palladium-Catalyzed Allylic Fluorination	x	x				B3LYP, M06	PCM
BI			Angew. Chem., Int. Ed.	2014	53	14428	14432	A Mild Dihydrobenzooxaphosphole Oxazoline/Iridium Catalytic System for Asymmetric Hydrogenation of Unfunctionalized Dialins	x	x				B3LYP
BMS			J. Org. Chem.	2014	79	6233	6243	The Effect of Additives on the Zinc Carbenoid-Mediated Cyclopropanation of a Dihydropyrrole	x	x				B3LYP	PCM
Gilead			Chem. - Eur. J.	2014	20	10360	10370	Divergent Pathways and Competitive Mechanisms of Metathesis Reactions between 3-Arylprop-2-ynyl Esters and Aldehydes: An Experimental and Theoretical Study	x		x			wB97XD//PBE-D3	COSMO-RS
Novartis			Chem. Sci.	2014	5	2352	2361	Non-directed allylic C-H acetoxylation in the presence of Lewis basic heterocycles		x				M06//B3LYP	SMD
Sanofi			Org. Biomol. Chem.	2014	12	8036	8047	An experimental and theoretical study of reaction mechanisms between nitriles and hydroxylamine			x			B3LYP	IEF-PCM
Bristol-Myers			J. Org. Chem.	2014	79	6233	6243	The effect of additives on the zinc carbenoid-mediated cyclopropanation of a dihydropyrrole	x	x				B3LYP	PCM
Amgen			J. Am. Chem. Soc.	2015	137	12261	12268	Accelerating Effect of Triazolyl and G75: Evidence of Hydrogen-Bond Stabilized Transition States	x		x			B3LYP
AstraZeneca			ACS Catal.	2015	5	3704	3716	Mechanistic Studies on the Alkylation of Amines with Alcohols Catalyzed by a Bifunctional Iridium Complex	x	x				B3LYP, M06	PBF
AstraZeneca			ChemCatChem	2015	7	4091	4097	Theoretical and Experimental Optimization of a New Amino Phosphite Ligand Library for Asymmetric Palladium-Catalyzed Allylic Substitution	x	x				B3LYP-D3	PCM
AstraZeneca			Chem. - Eur. J.	2015	21	5946	5953	On the Radical Nature of Iron-Catalyzed Cross-Coupling Reactions		x				B3LYP-D3	PBF
AstraZeneca			Dalton Trans.	2015	44	3959	3962	New insights into the mechanism of iron-catalyzed cross-coupling reactions	x	x				B3LYP	PBF
AstraZeneca			J. Pharm. Sci.	2015	104	4355	4364	Experimental and Quantum Chemical Evaluations of Pyridine Oxidation Under Drug Development Stress Test Conditions	x		x			M06	PCM
AstraZeneca			J. Comput. Chem.	2015	36	244	250	Improving the Q2MM Method for Transition State Force Field Modeling	x		x		x	B3LYP
AstraZeneca			J. Pharm. Sci.	2015	104	1409	1420	A Qualitative Method for Prediction of Amine Oxidation in Methanol and Water	x		x			M06	PCM
AstraZeneca			Org. Biomol. Chem.	2015	13	2776	2785	Conformational properties of 1,4-and 1,5-substituted 1,2,3-triazole amino acids - building units for peptidic foldamers	x		x			B3LYP, wB97XD, M06-2X, MP2	IEF-PCM
AstraZeneca			Synlett	2015	26	1371	1374	Sodium Amide Induced Cyclization of 2-Iodoprop-2-enylamines: Application to the Synthesis of 1-Aryl-2-methyleneaziridines	x		x			B3LYP	CPCM
BI			J. Org. Chem.	2015	80	1651	1660	Development of an Asymmetric Synthesis of a Chiral Quaternary FLAP Inhibitor	x		x			B3LYP
Merck			Org. Biomol. Chem.	2015	13	4169	4173	Absolute configuration of remisporines A & B	x		x			B3LYP, M06-2x	SMD
Merck			J. Am. Chem. Soc.	2015	137	14035	14038	Capture of Reactive Monophosphine-Ligated Palladium(0) Intermediates by Mass Spectrometry		x				B3LYP-D2-D3,M06-2x
AstraZeneca			Acc. Chem. Res.	2016	49	996	1005	Prediction of Stereochemistry using Q2MM	x	x			x	B3LYP
AstraZeneca			ACS Catal.	2016	6	1701	1712	Conformational Preferences of a Tropos Biphenyl Phosphinooxazoline-a Ligand with Wide Substrate Scope		x				B3LYP-D3	PCM
AstraZeneca			Chem. Commun.	2016	8	3099	3106	Mechanistic Insights into the Iridium-Catalyzed Hydrogenations of alpha,beta-Unsaturated Ketones		x				B3LYP-D3	PCM
AstraZeneca			J. Org. Chem.	2016	81	6862	6866	Structures and Rotational Barriers of a Diiodobinorsnoutane: Energetic Preference for Gauche Conformation	x		x			B97D, B3LYP, CAM-B3LYP
AstraZeneca			J. Org. Chem.	2016	81	5314	5321	Stereoselectivity in (Acyloxy)borane-Catalyzed Mukaiyama Aldol Reactions	x		x		x	B3LYP-D3, M06-2X	IEF-PCM
AstraZeneca			J. Am. Chem. Soc.	2016	138	9145	9157	Protodeboronation of Heteroaromatic, Vinyl, and Cyclopropyl Boronic Acids: pH-Rate Profiles, Autocatalysis, and Disproportionation	x		x			M06-L, M06, B3LYP	PCM
AstraZeneca			Nat. Commun.	2016	7	No. 12962		Metal-free photochemical silylations and transfer hydrogenations of benzenoid hydrocarbons and graphene	x		x			B3LYP, B3LYP_D3, CASPT2, CASSCF
AstraZeneca			Organometallics	2016	35	3323	3335	Asymmetric Catalyzed Allylic Substitution Using a Pd/P-S Catalyst Library with Exceptional High Substrate and Nucleophile Versatility: DFT and Pd-pi-allyl Key Intermediates Studies		x				B3LYP-D3	PCM
AstraZeneca			J. Org. Chem.	2016	81	11758	11765	Tetra- and Pentacationic Electrophiles and Their Chemistry	x		x			M06	PBF
BI			J. Am. Chem. Soc.	2016	138	15473	15481	Sequential C-H Arylation and Enantioselective Hydrogenation Enables Ideal Asymmetric Entry to the Indenopiperidine Core of an 11β-HSD-1 Inhibitor	x	x				B3LYP	CPCM
BI			Adv. Synth. Catal.	2016	358	3522	3527	Reengineered BI-DIME Ligand Core Based on Computer Modeling to Increase Selectivity in Asymmetric Suzuki-Miyaura Coupling for the Challenging Axially Chiral HIV Integrase Inhibitor	x	x				B3LYP
BI			Org. Lett.	2016	18	4920	4923	Synthesis of Enantioenriched 2-Alkyl Piperidine Derivatives through Asymmetric Reduction of Pyridinium Salts	x	x				B3LYP	CPCM
BI			Org. Chem. Front.	2016	3	1149	1153	Rh-catalyzed asymmetric conjugate addition of boronic acids to nitroalkenes employing a P-chiral P,π-hybrid ligand	x	x				B3LYP
Novartis			R. Soc. Open Sci.	2016	3	No. 150656		A synthetic, catalytic and theoretical investigation of an unsymmetrical SCN pincer palladacycle			x	x		ωB97XD	PCM
Pfizer			J. Org. Chem.	2016	81	9539	9552	Epimeric Face-Selective Oxidations and Diastereodivergent Transannular Oxonium Ion Formation Fragmentations: Computational Modeling and Total Syntheses of 12-Epoxyobtusallene IV, 12-Epoxyobtusallene II, Obtusallene X, Marilzabicycloallene C, and Marilzabicycloallene D	x		x			ωB97X-D	SCRF
Bristol-Myers			Lewis Base Catalysis in Organic Synthesis	2016	N/A	N/A	N/A	Principles, Definitions, Terminology, and Orbital Analysis of Lewis Base-Lewis Acid Interactions Leading to Catalysis
Bristol-Myers			ChemMedChem	2016	11	331	339	Nitroarenes as Antitubercular Agents: Stereoelectronic Modulation to Mitigate Mutagenicity			x			B3LYP	Gas
AstraZeneca			Adv. Synth. Catal.	2017	359	3261	3269	Combining Sanford Arylations on Benzodiazepines with the Nuisance Effect	x	x				PBE, wB97XD	CPCM
AstraZeneca			Chem. - Eur. J.	2017	23	13249	13258	Competing Pathways in O-Arylations with Diaryliodonium Salts: Mechanistic Insights	x		x			B3LYP-D3, M06-2x	PCM
AstraZeneca			J. Am. Chem. Soc.	2017	139	13156	13165	Base-Catalyzed Aryl-B(OH)(2) Protodeboronation Revisited: From Concerted Proton Transfer to Liberation of a Transient Aryl Anion	x		x			M06-L	PCM
AstraZeneca			New J. Chem.	2017	41	3619	3633	C=C/B-N substitution in five membered heterocycles. A computational analysis			x			CBS-QB3, B3LYP	IEF-PCM
AstraZeneca			Org. Lett.	2017	19	2738	2741	Selective Synthesis of Spirooxindoles by an Intramolecular Heck-Mizoroki Reaction	x	x				B3LYP-D3	PBF
AstraZeneca			Org. Lett.	2017	19	1602	1605	Regio- and Stereoselective Synthesis of Functionalized Cyclopentene Derivatives via Mizoroki-Heck Reactions	x	x				B3LYP-D3	PBF
BI			Org. Lett.	2017	19	3338	3341	. Enantioselective Nickel-Catalyzed Mizoroki-Heck Cyclizations To Generate Quaternary Stereocenters	x	x				M06, B3LYP	SMD
Gilead			J. Org. Chem.	2017	82	11337	11347	Control of α/β Anomer Formation by a 2',5' Bridge: Toward Nucleoside Derivatives Locked in the South Conformation	x					B3LYP	PCM
GSK			ACS Catal.	2017	7	6901	6908	Kinetic Analysis of Copper(I)/Feringa-Phosphoramidite Catalyzed AlEt3 1,4-Addition to Cyclohex-2-en-1-one		x				ωB97X-D, CAM-B3LYP
GSK			Adv. Synth. Catal.	2017	359	1007	1017	Iron-Catalyzed Isopropylation of Electron-Deficient Aryl and Heteroaryl Chlorides				x		B3LYP,M06-2X
GSK			Acc. Chem. Res.	2017	2	5737	5747	New Insights into the Catalytic Mechanism of Aldose Reductase: A QM/MM Study	x					B3LYP/OPLS2005, QM/MM	explicit
Merck			Science	2017	356	426	430	A multifunctional catalyst that stereoselectively assembles prodrugs	x		x			M06L,M06-2x B3LYP-D3	SMD
Merck			Chem. Sci.	2017	8	2841	2851	A rational pre-catalyst design for bis-phosphine mono-oxide palladium catalyzed reactions	x	x				M06	SDD
Merck			J. Am. Chem. Soc.	2017	139	10637	10640	Asymmetric Hydrogen Bonding Catalysis for the Synthesis of Dihydroquinazoline-Containing Antiviral, Letermovir	x		x			M06//B3LYP-D2	SMD
Merck			J. Am. Soc. Mass Spectrom.	2017	28	452	460	Mechanistic Study of the Gas-Phase In-Source Hofmann Elimination of Doubly Quaternized Cinchona-Alkaloid Based Phase-Transfer Catalysts by (+)-Electrospray Ionization/Tandem Mass Spectrometry	x		x			M06-2X
Merck			J. Org. Chem.	2017	82	8645	8650	Model for the Enantioselectivity of Asymmetric Intramolecular Alkylations by Bis-Quaternized Cinchona Alkaloid-Derived Catalysts	x		x			B3LYP-D3BJ, M06-2X	SMD
Merck			J. Am. Chem. Soc.	2017	139	8337	8345	Palladium-Catalyzed Enantioselective Arylation of Aryl Sulfenate Anions: A Combined Experimental and Computational Study	x	x				OLYP, O3LYP, TPSS, TPSS0, and B3LYP	COSMO
Merck			ACS Catal.	2017	7	1446	1451	Ruthenium-Catalyzed Dynamic Kinetic Resolution Asymmetric Transfer Hydrogenation of β-Chromanones by an Elimination-Induced Racemization Mechanism	x	x				M06-2X,B3LYP	SMD
Merck			Org. Lett.	2017	19	4448	4451	Selective Formation of Functionalized α-Quaternary Malononitriles toward 5,5-Disubstituted Pyrrolopyrimidinones	x	x				M06, B3LYP, D2 or D3, etc	SMD
Merck			J. Org. Chem.	2017	82	9023	9029	Asymmetric Formal Synthesis of the Long-Acting DPP-4 Inhibitor Omarigliptin			x			M06,M06-2x,B3LYP
Novartis			J. Am. Chem. Soc.	2017	139	10613	10616	Inverting Conventional Chemoselectivity in Pd-Catalyzed Amine Arylations with Multiply Halogenated Pyridines			x			M06-2x
Pfizer			Angew. Chem., Int. Ed.	2017	56	15309	15313	Visible-Light-Initiated Manganese Catalysis for C-H Alkylation of Heteroarenes: Applications and Mechanistic Studies	x		x			B3LYP	CPCM
Roche			J. Org. Chem.	2017	82	1726	1742	Intramolecular Inverse Electron-Demand [4 + 2] Cycloadditions of Ynamides with Pyrimidines: Scope and Density Functional Theory Insights	x		x			M06-2X	PCM
AstraZeneca			J. Inorg. Biochem.	2018	181	28	40	Theoretical studies of the second step of the nitric oxide synthase reaction: Electron tunneling prevents uncoupling	x	x				M06-L	PBF
AstraZeneca			Angew. Chem., Int. Ed.	2018	57	982	985	Quantitative Prediction of Rate Constants for Aqueous Racemization To Avoid Pointless Stereoselective Syntheses			x			B3LYP	PCM
AstraZeneca			ACS Catal.	2018	8	615	623	Revisiting the Stereodetermining Step in Enantioselective Iridium-Catalyzed Imine Hydrogenation	x	x				M06	SMD
AstraZeneca			J. Am. Chem. Soc.	2018	140	11510	11518	Dual Roles for Potassium Hydride in Haloarene Reduction: CS<inf>N</inf>Ar and Single Electron Transfer Reduction via Organic Electron Donors Formed in Benzene	x	x	x			M06-2X	PCM
AstraZeneca	Merck	AbbVie	Drug Discov. Today	2018	23	1203	1218	Computational prediction of chemical reactions: current status and outlook
Boehringer Ingelheim			Org. Lett.	2018	20	1333	1337	Enantioselective Synthesis of a-(Hetero)aryl Piperidines through Asymmetric Hydrogenation of Pyridinium Salts and Its Mechanistic Insights	x	x				PBE-D2	PCM
Boehringer Ingelheim			Chem. Sci.	2018	9	4505	4510	Copper-catalyzed asymmetric hydrogenation of 2-substituted ketones: Via dynamic kinetic resolution	x	x				B3LYP	PCM
Pfizer			Org. Lett.	2018	20	3229	3232	Metal-Free-Visible Light C-H Alkylation of Heteroaromatics via Hypervalent Iodine-Promoted Decarboxylation	x		x			B3LYP	CPCM
Sanofi-Aventis			Angew. Chem., Int. Ed.	2018	57	8159	8163	Highly Selective Directed Iridium-Catalyzed Hydrogen Isotope Exchange Reactions of Aliphatic Amides	x	x				M06
Vertex			Tetrahedron	2018	74	7103	7110	A computational study on the stereoselective reduction of cyclic ketones by LiAl(OR)<inf>3</inf>H in THF	x		x			B3LYP, B3LYP-D3, M06-2X
AstraZeneca			Adv. Synth. Catal.	2018	360	3124	3127	Enantioselective Synthesis of Sterically Hindered Tertiary α‐Aryl Oxindoles via Palladium‐Catalyzed Decarboxylative Protonation. An Experimental and Theoretical Mechanistic Investigation	x	x				B3LYP-D3	PCM
AstraZeneca			Chem. Commun.	2018	54	8294	8311	Application of Q2MM to Predictions in Stereoselective Synthesis					x
Merck			J. Am. Chem. Soc.	2018	140	13843	13853	Discovery of a Photoinduced Dark Catalytic Cycle Using in Situ LED- NMR Spectroscopy	x	x				B3LYP-D3
Merck			Org. Lett.	2018	20	5752	5756	Metal- and Acid-Free C-H Formylation of Nitrogen Heterocycles: Using Trioxane as an Aldehyde Equivalent Enabled by an Organic-Soluble Oxidant	x		x			B3LYP
AstraZeneca			J. Org. Chem.	2019	84	4695	4703	A Predictive Tool for Electrophilic Aromatic Substitutions Using Machine Learning			x	x	x	PM3, TPSSh
Boehringer Ingelheim	Apeiron	Astatech	Chem. Sci.	2019	10	4339	4345	A versatile catalyst system for enantioselective synthesis of 2-substituted 1,4-benzodioxanes	x	x				PBE-D2	PCM
Eli Lilly			Chem. - Eur. J.	2019	25	6508	6512	One-Pot Sequential Kumada–Tamao–Corriu Couplings of (Hetero)Aryl Polyhalides in the Presence of Grignard-Sensitive Functional Groups Using Pd-PEPPSI-IPent Cl	x	x				wB97XD	SMD
Eli Lilly			Org. Process Res. Dev.	2019	23	78	87	Finding the Perfect Match: A Combined Computational and Experimental Study toward Efficient and Scalable Photosensitized [2 + 2] Cycloadditions in Flow			x			M06-2X	CPCM
Sanofi-Aventis			Chem. - Eur. J.	2019	25	6517	6522	Directed Iridium-Catalyzed Hydrogen Isotope Exchange Reactions of Phenylacetic Acid Esters and Amides	x	x				M06
AstraZeneca			Nature Catal.	2019	2	41	45	Rapid Virtual Screening of Enantioselective Catalysts Using CatVS	x				x	B3LYP
AstraZeneca			ACS Catal.	2019	9	6033	6048	An Improved Class of Phosphite-Oxazoline Ligands for Pd-Catalyzed Allylic Substitution Reactions	x	x
AstraZeneca			iScience	2019	20	373	391	Relative Strength of Common Directing Groups in Palladium-Catalyzed Aromatic C-H Activation	x	x				B3LYP-D3	PBF
Merck			J. Org. Chem.	2019	84	10024	10031	Unexpected Propargylic Retro-Brook Rearrangements in Alkynes	x	x				M06-2X	SMD
Merck			Org. Process Res. Dev.	2019	23	1178	1190	Process Safety Considerations for the Supply of a High-Energy Oxadiazole IDO1-Selective Inhibitor			x			M06-2X-D3	SMD
Novartis			Nature Commun.	2019	10			Organopolymer with dual chromophores and fast charge-transfer properties for sustainable photocatalysis			x	x		B3LYP	PCM
Novartis			J. Chem. Inf. Model.	2019	59	4806	4813	Benchmarking Different QM Levels for Usage with COSMO-RS					x	Various
Astra Zeneca			J. Am. Chem. Soc.	2019	141	18600	18611	Kinetics and Mechanism of the Arase-Hoshi R<inf>2</inf>BH-Catalyzed Alkyne Hydroboration: Alkenylboronate Generation via B-H/C-B Metathesis			x			M06L
Merck			J. Am. Chem. Soc.	2019	141	16743	16754	Matching Glycosyl Donor Reactivity to Sulfonate Leaving Group Ability Permits SN2 Glycosylations			x			B3LYP-D3	PCM
